# Supplementary material for: A tremella-like in situ synthesis of ZIF-67Co(OH)F@Co3O4 on carbon cloth as an electrode material for supercapacitors
Source: Royal Society of Chemistry journal article supplement (doi:10.1039/d4ra04250f), 2024-01-01
Supplement: d4ra04250f1.pdf [file d4ra04250f1.pdf]

Supporting information:

**A tremella-like *In situ* synthesis of ZIF-67Co(OH)F@Co<sub>3</sub>O<sub>4</sub> upon carbon cloth as an electrode material for supercapacitor**

Shakeel Ahmad<sup>a</sup>, Muhammad Tariq<sup>a</sup>, Zia Ur Rehman<sup>\*b</sup>, Shanshan Yao<sup>b</sup>, Bing Zhu<sup>a</sup>, Henmei Ni<sup>\*a</sup>, Muhammad Samiuddin<sup>c</sup>, Khalid Ali Khan<sup>d</sup>, Magdi E.A. Zaki<sup>e</sup>

- a. *School of Chemistry and Chemical Engineering, Southeast University, Nanjing 211189, PR China*
- b. *Institute for Advanced Materials, College of Materials Science and Engineering, Jiangsu University, Zhenjiang 212013, P. R. China*
- c. *Metallurgical Engineering Department, NED University of Engineering and Technology, Karachi, 75850, Pakistan,*
- d. *Advanced Materials Science (RCAMS), King Khalid University, Abha 61413, Saudi Arabia*
- e. *Department of Chemistry, Faculty of Science, Imam Mohammad Ibn Saud Islamic University, Riyadh 13318, Saudi Arabia*

Corresponding author: Henmei Ni ([\\*henmei\\_ni@seu.edu.cn](mailto:*henmei_ni@seu.edu.cn))

---

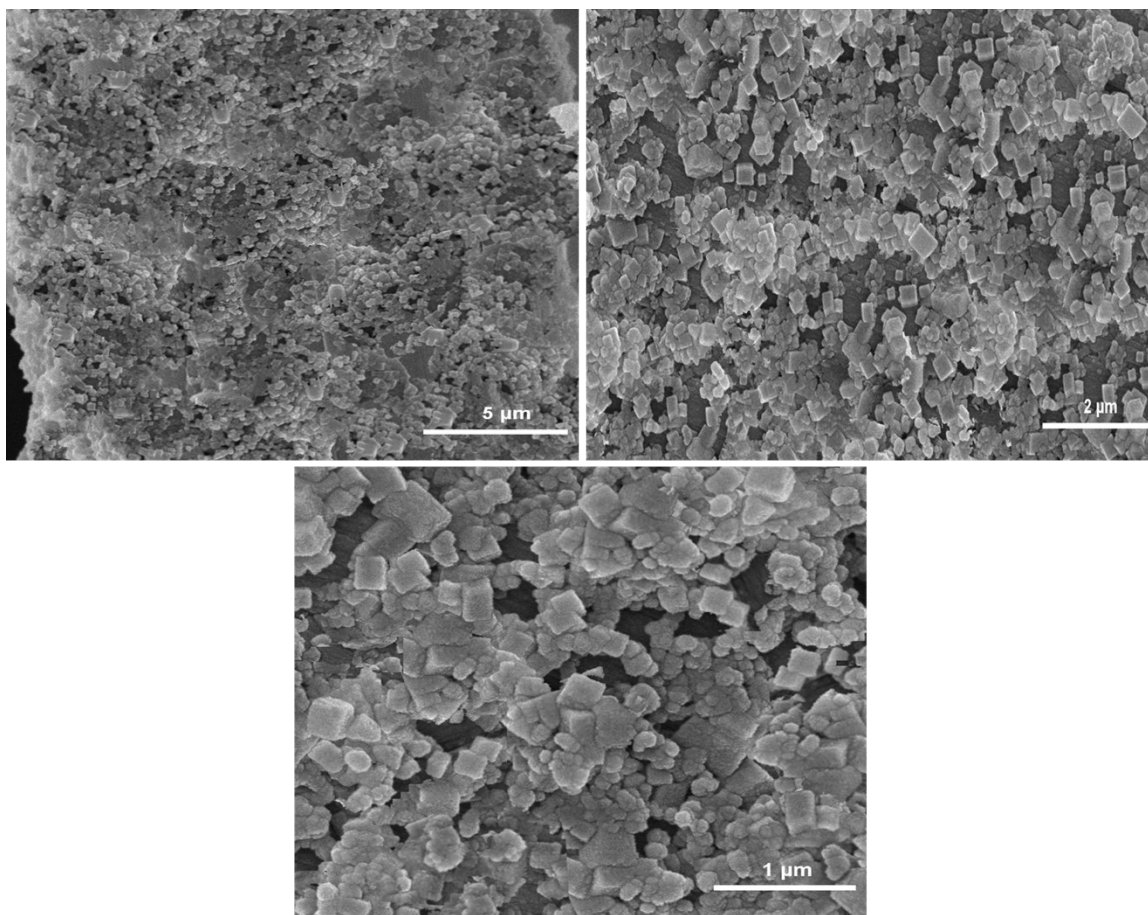

Fig S1. SEM images of ZIF-67Co(OH)F/ CC120 at different magnification.

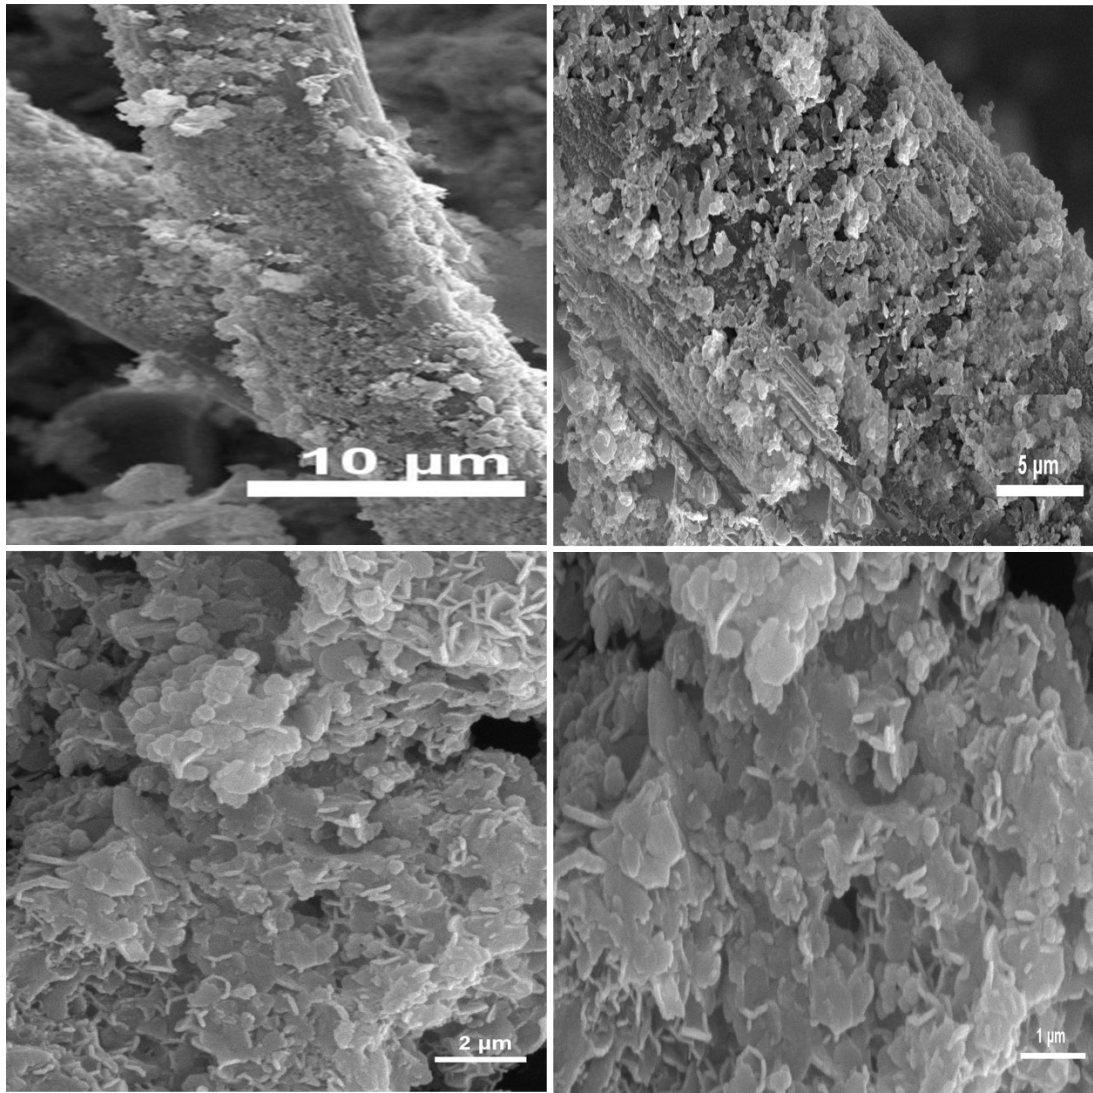

**Fig S2.** SEM images of ZIF-67Co(OH)F@Co<sub>3</sub>O<sub>4</sub>/ CC 160 at different magnification.

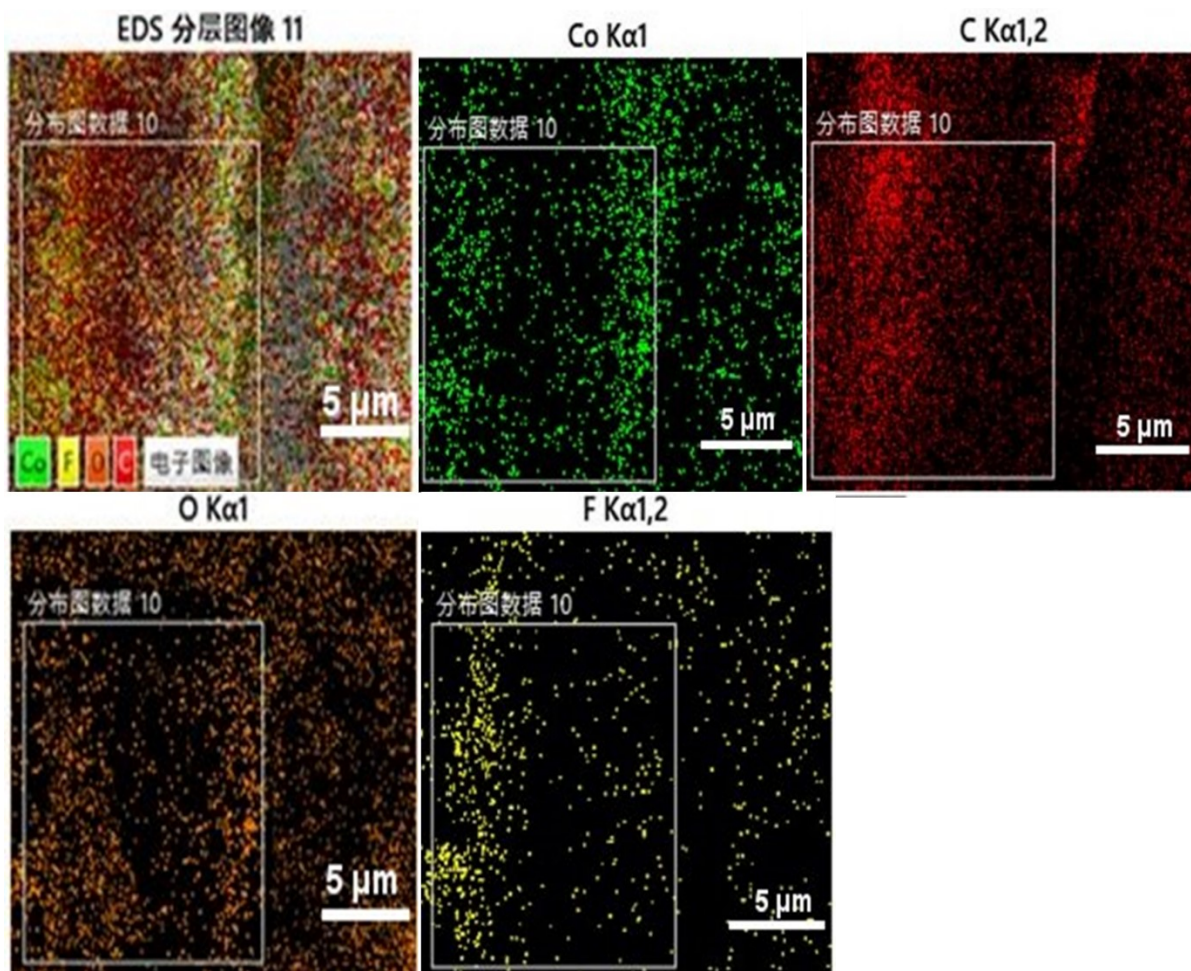

Fig S3. EDS mapping result of O,C,Co, and F in ZIF-67Co(OH)F@Co<sub>3</sub>O<sub>4</sub>200

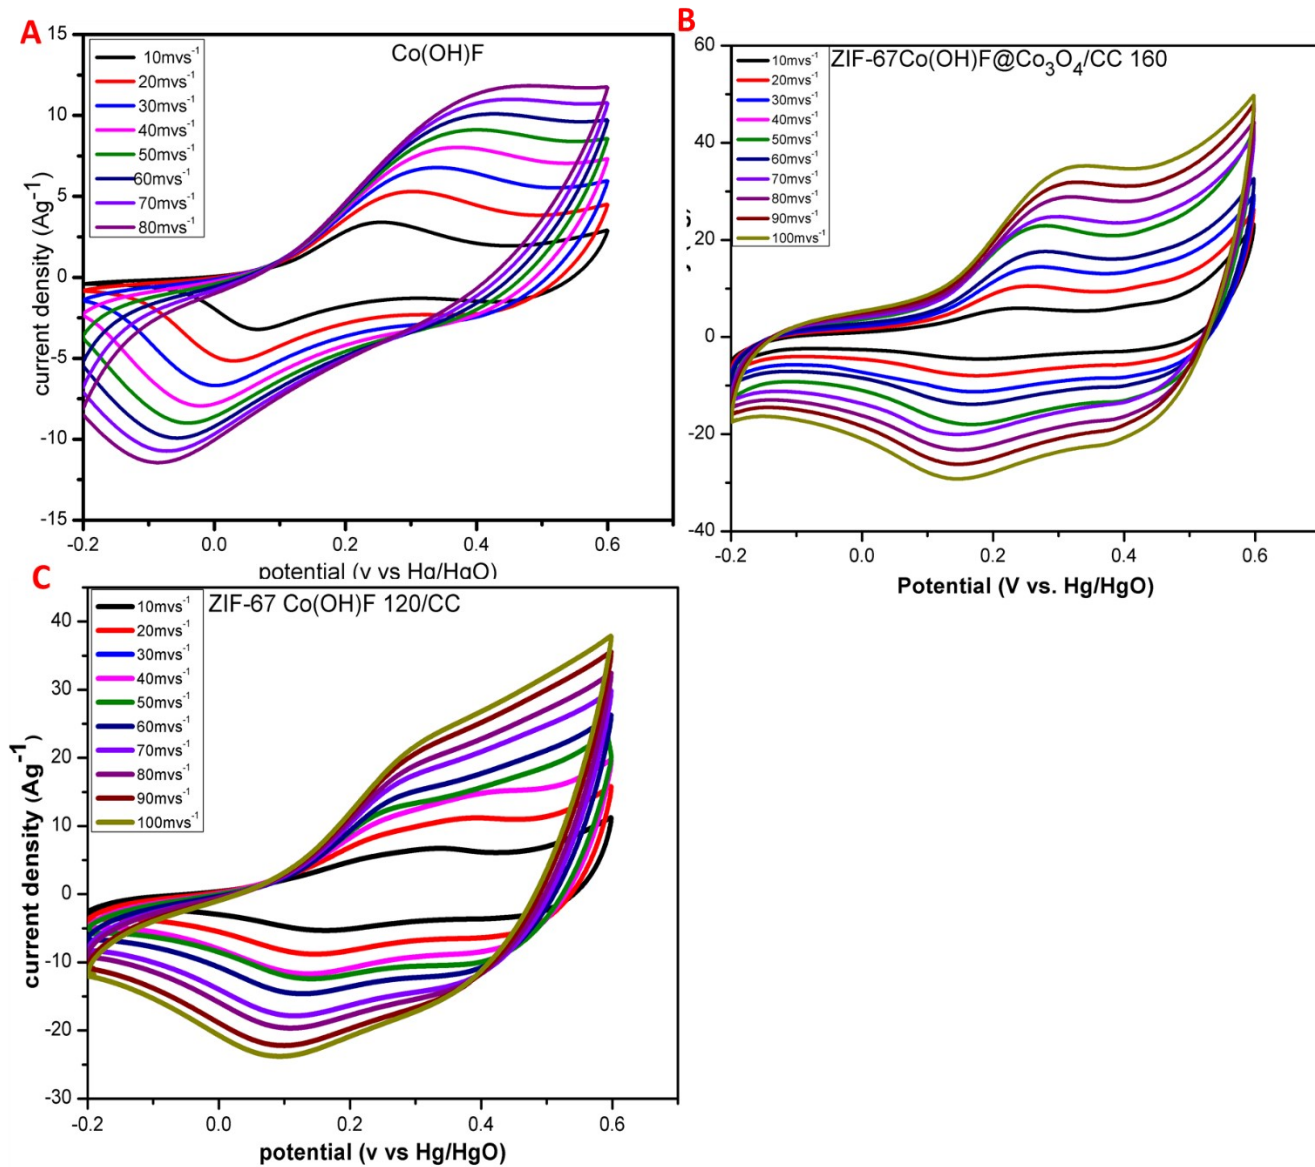

Fig. S4. (a) CV curves of Co(OH)F (b) CV curves of ZIF67-Co(OH)F@Co<sub>3</sub>O<sub>4</sub>160(c) CV curves of ZIF67-Co(OH)F120

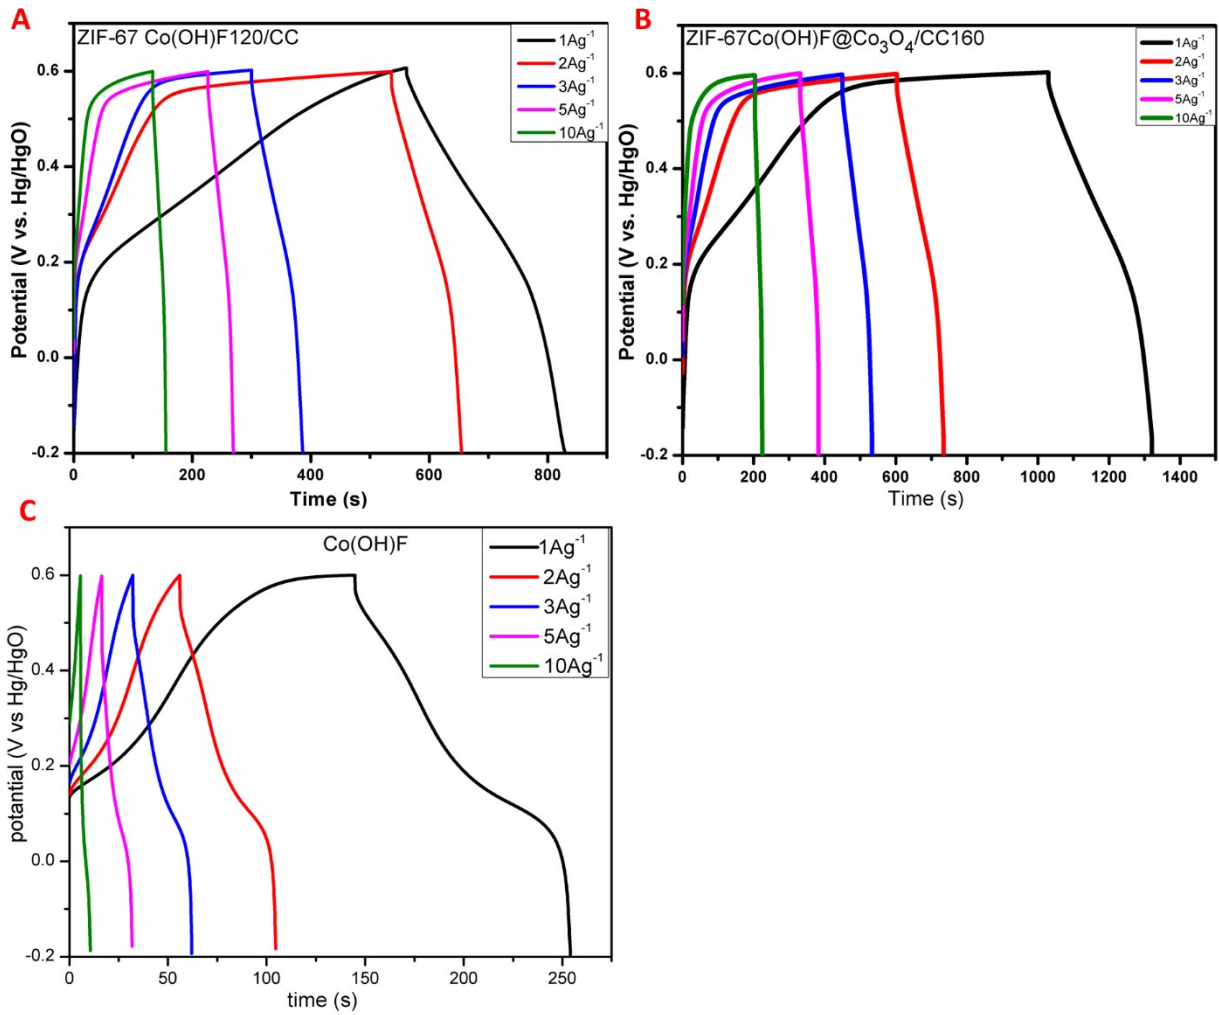

Fig. S5. (a) GCD curves of ZIF67-Co(OH)F/CC 120, (b) GCD curves ZIF67-Co(OH)F@Co<sub>3</sub>O<sub>4</sub>160(c) GCD curves of Co(OH)F

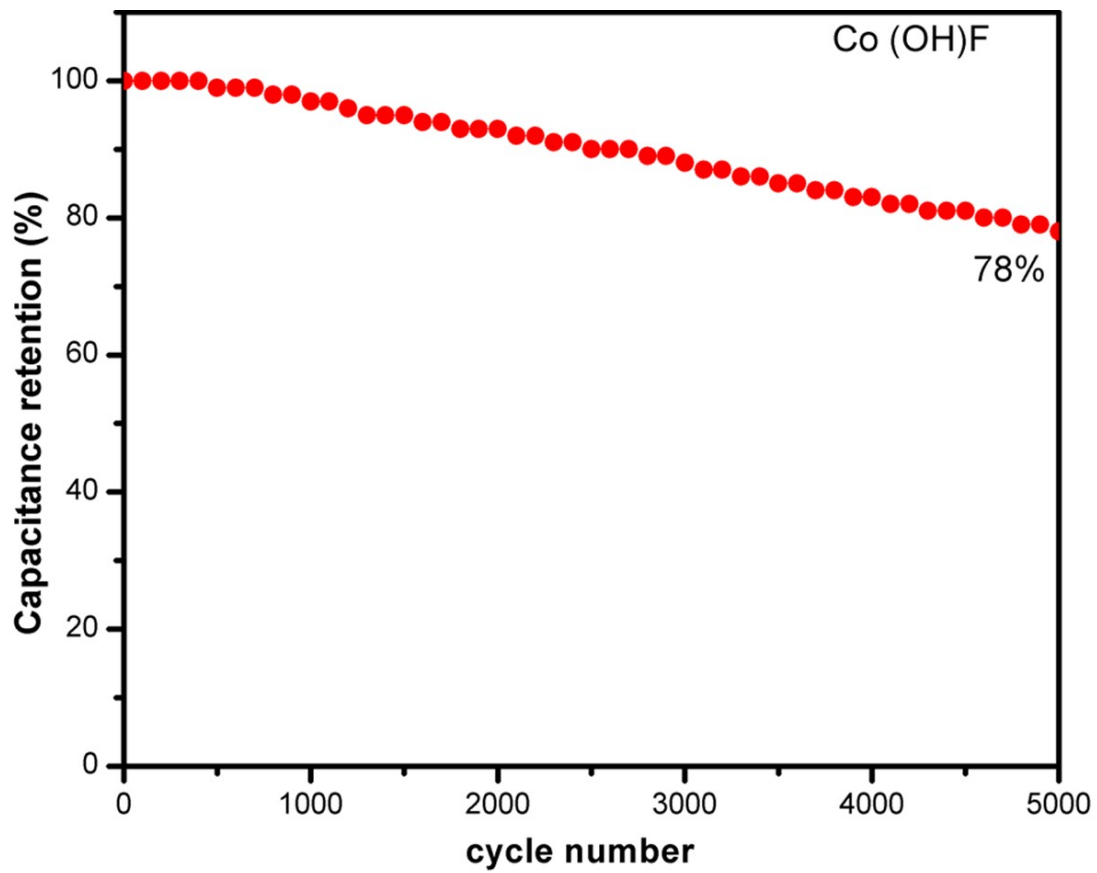

Fig.S6. cyclic stability at current density of  $10\text{Ag}^{-1}$  of Co(OH)F electrode.
